# Supplementary material for: Redox signals at the ER–mitochondria interface control melanoma progression
Source: PubMed Central journal article supplement — EMBO J. 2019 Jul 15;38(15):e100871. doi: 10.15252/embj.2018100871 (PMC6669928; doi:10.15252/embj.2018100871), 2019-07-15
Supplement: EMBJ-38-e100871-s001.pdf [file EMBJ-38-e100871-s001.pdf]

## **Redox signals at the ER-mitochondria interface control melanoma progression**

Xin Zhang<sup>1,2,\*</sup>, Christine S. Gibhardt<sup>1,\*</sup>, Thorsten Will<sup>3</sup>, Hedwig Stanisz<sup>4</sup>, Christina Körbel<sup>5</sup>, Miso Mitkovski<sup>6</sup>, Ioana Stejerean<sup>1</sup>, Sabrina Cappello<sup>1</sup>, David Pacheu-Grau<sup>7</sup>, Jan Dudek<sup>7</sup>, Nasser Tahbaz<sup>8</sup>, Lucas Mina<sup>8</sup>, Thomas Simmen<sup>8</sup>, Matthias W. Laschke<sup>5</sup>, Michael D. Menger<sup>5</sup>, Michael P. Schön<sup>4</sup>, Volkhard Helms<sup>3</sup>, Barbara A. Niemeyer<sup>9</sup>, Peter Rehling<sup>7,10</sup>, Adina Vultur<sup>1</sup>, Ivan Bogeski<sup>1,2,\$</sup>

<sup>1</sup>Molecular Physiology, Institute of Cardiovascular Physiology, University Medical Center, Georg-August-University, Göttingen, Germany

<sup>2</sup>Biophysics, Center for Integrative Physiology and Molecular Medicine, Saarland University, Homburg, Germany

<sup>3</sup>Center for Bioinformatics, Saarland University, Saarbrücken, Germany

<sup>4</sup>Department of Dermatology, Venereology and Allergology, University Medical Center, Georg-August-University, Göttingen, Germany

<sup>5</sup>Institute for Clinical and Experimental Surgery, Saarland University, Homburg, Germany

<sup>6</sup>Light Microscopy Facility, Max Planck Institute for Experimental Medicine, Göttingen, Germany

<sup>7</sup>Department of Cellular Biochemistry, University Medical Center, Germany

<sup>8</sup>Department of Cell Biology, University of Alberta, Edmonton, Canada

<sup>9</sup>Molecular Biophysics, Center for Integrative Physiology and Molecular Medicine, Saarland University, Homburg, Germany

<sup>10</sup>Max Planck Institute for Biophysical Chemistry, Göttingen, Germany

\*equal contribution

§Correspondence:

Prof. Dr. med. Ivan Bogeski

Molecular Physiology

Institute of Cardiovascular Physiology, University Medical Center, Georg-August-University

Humboldtallee 23, 37073 Goettingen, Germany

Tel: 0551 39 65520, Fax: 0551 39 5895

E-Mail: [ivan.bogeski@med.uni-goettingen.de](mailto:ivan.bogeski@med.uni-goettingen.de)

## **APPENDIX MATERIAL**

Table S1: Panel of genetically distinct melanoma cell lines grouped for BRAF and N-RAS mutations

Table S2: Univariate Cox analysis

Table S3: Multivariate Cox analysis

Table S4: The role of BRAF status on NFAT1, TMX1 and TMX3 expression in melanoma patients

Table S5: Differentially expressed genes after NFAT1 silencing in melanoma

Table S6: Primers used for RT-qPCR

Table S7: Primary antibodies used for immunoblotting and immunohistochemistry

## APPENDIX TABLES

**Table S1: Panel of genetically distinct melanoma cell lines grouped for BRAF and N-RAS mutations\***

| <b>Cell line</b> | <b>BRAF</b> | <b>N-RAS</b> |
|------------------|-------------|--------------|
| WM3734           | V600E       | WT           |
| Mel Juso         | WT          | Q61K         |
| WM164            | V600E       | WT           |
| WM983B           | V600E       | WT           |
| 1205Lu           | V600E       | WT           |
| WM9              | V600E       | WT           |
| WM3918           | WT          | WT           |
| SK Mel 5         | V600E       | WT           |
| 451Lu C2         | V600E       | WT           |
| WM1366           | WT          | Q61L         |

*\*All sequencing analyses were performed in the K. Nathanson laboratory, Cancer Genetics, University of Pennsylvania, Philadelphia, PA, USA). All cell lines have been fingerprinted for their uniqueness and to exclude cross-contamination. WT, wild type.*

**Table S2: Univariate Cox analysis**

| Descriptor  | HR     | CI 95 %-<br>low | CI 95 %-<br>high | z-<br>score | p-<br>value | LR-test p-<br>value |
|-------------|--------|-----------------|------------------|-------------|-------------|---------------------|
| TMX3 state  | 3.0853 | 1.4052          | 6.7738           | 2.8078      | 0.0050      | 0.0038              |
| NFAT1 expr  | 1.0239 | 1.0049          | 1.0433           | 2.4726      | 0.0134      | 0.0578              |
| NFAT1 state | 1.8734 | 0.8897          | 3.9447           | 1.6523      | 0.0985      | 0.0987              |
| TMX1 state  | 1.7227 | 0.8131          | 3.6497           | 1.4198      | 0.1557      | 0.1633              |
| TMX3 expr   | 1.0786 | 0.9701          | 1.1993           | 1.3993      | 0.1617      | 0.1641              |
| TMX1 expr   | 1.0169 | 0.9666          | 1.0697           | 0.6470      | 0.5176      | 0.5216              |

**Table S3: Multivariate Cox analysis**

**Assessment of descriptors contributing to the model**

| <b>Descriptor</b> | <b>HR</b> | <b>CI 95 %-low</b> | <b>CI 95 %-high</b> | <b>z-score</b> | <b>p-value ( Pr(&gt; z ) )</b> |
|-------------------|-----------|--------------------|---------------------|----------------|--------------------------------|
| NFAT1 expr        | 1.02      | 1.001              | 1.039               | 2.053          | 0.04004                        |
| TMX3 state        | 2.943     | 1.331              | 6.508               | 2.666          | 0.00768                        |

**Assessment of the model (2 degrees of freedom)**

| <b>Statistical test</b> | <b>p-value</b> |
|-------------------------|----------------|
| Likelihood ratio test   | 0.003944       |
| Wald test               | 0.001652       |
| Log-rank test           | 0.000386       |

**Table S4: The role of BRAF genotype on NFAT1, TMX1 and TMX3 expression in melanoma patients\***

|                     | NFAT1   |      | TMX1 |      | TMX3 |      |
|---------------------|---------|------|------|------|------|------|
|                     | low     | high | low  | high | low  | high |
| <b>WT</b>           | 34      | 15   | 38   | 11   | 30   | 19   |
| <b>V600E</b>        | 22      | 26   | 28   | 20   | 25   | 23   |
| Fisher's exact test | p=0.024 |      | n.s  |      | n.s  |      |

*\*Discretized mRNA expression of NFAT1, TMX1 and TMX3 in BRAF WT and BRAF V600E melanoma patients. The expression was characterized high or low as described in the manuscript.*

**Table S5: Differentially expressed genes after NFAT1 silencing in melanoma** (data are extracted from (Shoshan et al., 2016) and (Aibar et al., 2017))

- 1) Mitochondrion-localized
- 2) Redox-related
- 3) Deregulating Cellular Energetics
- 4) Resisting Cell Death
- 5) Tumor-Promoting Inflammation
- 6) Genome Instability and Mutation
- 7) Evading Growth Suppressors
- 8) Avoiding Immune Destruction
- 9) Sustaining Proliferative Signaling
- 10) Activating Invasion and Metastasis
- 11) Enabling Replicative Immortality
- 12) Inducing Angiogenesis

**Both (upregulated)**

| Gene       | 1) | 2) | 3) | 4) | 5) | 6) | 7) | 8) | 9) | 10) | 11) | 12) |
|------------|----|----|----|----|----|----|----|----|----|-----|-----|-----|
| ACPP       |    |    |    |    | X  |    |    |    |    |     |     |     |
| AMACR      | X  |    |    |    |    |    |    |    |    |     |     |     |
| ARHGAP23   |    |    |    |    |    |    |    |    |    |     |     |     |
| BTBD1      |    |    |    |    |    |    |    |    |    |     |     |     |
| BTG2       |    |    |    | X  |    | X  | X  |    |    |     |     |     |
| C15orf39   |    |    |    |    |    |    |    |    |    |     |     |     |
| CD276      |    |    |    |    | X  |    | X  |    |    |     |     |     |
| CDCP1      |    |    |    |    |    |    |    |    |    |     |     |     |
| CDK6       |    |    |    |    | X  |    | X  |    | X  |     |     |     |
| CDKN1A     |    |    |    | X  |    |    | X  |    |    |     | X   |     |
| CORO2B     |    |    |    |    |    |    |    |    |    |     |     |     |
| CSGALNACT1 |    |    |    |    |    |    | X  |    |    |     |     |     |
| CTSA       |    |    |    |    | X  |    |    |    |    |     |     |     |
| CYBRD1     |    | X  |    |    |    |    |    |    |    |     |     |     |



|          |   |   |  |   |   |  |   |   |   |   |  |   |
|----------|---|---|--|---|---|--|---|---|---|---|--|---|
| DHRS2    | X | X |  | X | X |  |   |   |   |   |  |   |
| DVL2     |   |   |  |   |   |  | X |   | X |   |  |   |
| FAM3C    |   |   |  |   |   |  |   |   |   |   |  |   |
| FAM46C   |   |   |  |   |   |  |   |   |   |   |  |   |
| FGFR1    |   |   |  | X |   |  | X |   | X | X |  | X |
| GNPTAB   |   |   |  |   |   |  |   |   |   |   |  |   |
| HIPK3    |   |   |  | X |   |  |   |   |   |   |  |   |
| HSPA6    |   |   |  |   | X |  |   |   |   |   |  |   |
| HYOU1    |   |   |  | X |   |  |   |   |   |   |  |   |
| IL1A     |   |   |  | X | X |  | X |   | X |   |  |   |
| ITGA4    |   |   |  |   | X |  |   |   | X | X |  |   |
| JAG1     |   |   |  |   |   |  |   |   | X |   |  | X |
| JAK1     |   |   |  |   |   |  |   |   | X | X |  |   |
| LAMB3    |   |   |  |   |   |  |   |   |   | X |  |   |
| LIF      |   |   |  |   |   |  |   |   | X |   |  |   |
| MAP1B    |   |   |  |   |   |  |   |   |   |   |  |   |
| MAP3K1   |   |   |  | X |   |  |   |   | X |   |  |   |
| MAP4K4   |   |   |  | X |   |  |   |   |   |   |  |   |
| MARCKSL1 |   |   |  |   |   |  |   |   |   |   |  |   |
| MKRN1    |   |   |  |   |   |  |   |   |   |   |  |   |
| NPL      |   |   |  |   |   |  |   |   |   |   |  |   |
| NPTX2    |   |   |  |   |   |  |   |   |   |   |  |   |
| NUMA1    |   |   |  |   |   |  | X | X |   |   |  |   |
| OLFML3   |   |   |  |   |   |  |   |   |   |   |  |   |
| PARP10   |   |   |  |   |   |  |   |   |   |   |  |   |
| PBXIP1   |   |   |  |   |   |  |   |   |   |   |  |   |
| PFKFB4   |   |   |  |   |   |  |   |   |   |   |  |   |
| PHLDA1   |   |   |  | X |   |  | X |   |   |   |  |   |
| PLEKHA4  |   |   |  |   |   |  |   |   |   |   |  |   |
| RAB5B    |   |   |  |   | X |  |   | X |   |   |  |   |
| RHOB     |   |   |  | X |   |  | X |   |   | X |  | X |
| RNF19A   |   |   |  |   |   |  |   |   |   |   |  |   |
| RUSC2    |   |   |  |   |   |  |   |   |   |   |  |   |
| SMURF2   |   |   |  |   |   |  |   |   | X |   |  |   |
| SPP1     |   |   |  |   | X |  |   |   |   | X |  |   |
| SPRY1    |   |   |  |   |   |  | X |   |   |   |  |   |
| SYTL5    |   |   |  |   |   |  |   |   |   |   |  |   |
| TAP1     | X |   |  |   |   |  |   | X |   |   |  |   |
| TCN1     |   |   |  |   | X |  |   |   |   |   |  |   |
| TLN1     |   |   |  |   |   |  |   |   | X | X |  |   |
| TMEM8A   |   |   |  |   |   |  |   |   |   |   |  |   |

|       |  |   |  |  |  |  |   |  |  |  |  |  |
|-------|--|---|--|--|--|--|---|--|--|--|--|--|
| TWF1  |  |   |  |  |  |  |   |  |  |  |  |  |
| UCN2  |  |   |  |  |  |  |   |  |  |  |  |  |
| USP22 |  |   |  |  |  |  | X |  |  |  |  |  |
| VAT1L |  | X |  |  |  |  |   |  |  |  |  |  |

**Both (downregulated)**

| Gene     | 1) | 2) | 3) | 4) | 5) | 6) | 7) | 8) | 9) | 10) | 11) | 12) |
|----------|----|----|----|----|----|----|----|----|----|-----|-----|-----|
| ACAN     |    |    |    |    |    |    |    |    |    | X   |     |     |
| AIP      |    |    |    |    |    |    |    |    | X  |     |     |     |
| AKR1C3   |    | X  |    | X  |    |    |    |    |    |     |     |     |
| ALDOC    | X  |    | X  |    | X  |    |    |    |    |     |     |     |
| BCL7C    |    |    |    | X  |    |    |    |    |    |     |     |     |
| BIK      | X  |    |    | X  |    |    |    |    |    |     |     |     |
| BLVRB    |    | X  |    |    |    |    |    |    |    |     |     |     |
| BNIP3    | X  |    |    | X  |    |    |    |    |    |     |     |     |
| C1orf123 |    |    |    |    |    |    |    |    |    |     |     |     |
| CAPG     |    |    |    |    |    |    |    |    |    |     |     |     |
| CCDC12   |    |    |    |    |    |    |    |    |    |     |     |     |
| CCNB1    | X  |    |    |    |    | X  | X  |    |    |     |     |     |
| CDCA4    |    |    |    |    |    |    |    |    |    |     |     |     |
| COPZ1    |    |    |    |    |    |    |    |    |    |     |     |     |
| COX6B1   | X  | X  | X  |    |    |    |    |    |    |     |     |     |
| CSTB     |    |    |    |    | X  |    |    |    |    |     |     |     |
| CUTA     |    |    |    |    |    |    |    |    |    |     |     |     |
| DEF8     |    |    |    |    |    |    |    |    |    |     |     |     |
| DPCD     |    |    |    |    |    |    |    |    |    |     |     |     |
| EIF4E    |    |    |    |    |    |    | X  |    |    |     |     |     |
| ENPP2    |    |    |    |    |    |    |    |    |    |     |     |     |
| FAM162A  | X  |    |    | X  |    |    |    |    |    |     |     |     |
| FAT3     |    |    |    |    |    |    |    |    |    | X   |     |     |
| GPI      |    |    | X  | X  | X  |    |    |    |    |     |     | X   |
| ITIH5    |    |    |    |    |    |    |    |    |    |     |     |     |
| KLF9     |    |    |    |    |    |    |    |    |    |     |     |     |
| KRTCAP2  |    |    |    |    |    |    |    |    |    |     |     |     |
| LACTB2   | X  |    |    |    |    |    |    |    |    |     |     |     |
| LARP6    |    |    |    |    |    |    |    |    |    |     |     |     |
| LCN2     |    |    |    | X  | X  |    |    |    | X  |     |     |     |
| MDH2     | X  | X  | X  |    |    |    |    |    |    |     |     |     |
| NDUFA11  | X  |    | X  |    |    |    |    |    |    |     |     |     |
| NDUFA7   | X  | X  | X  |    |    |    |    |    |    |     |     |     |
| NDUFA9   | X  | X  | X  |    |    |    |    |    |    |     |     |     |

|          |   |   |   |   |  |  |  |  |   |   |  |  |
|----------|---|---|---|---|--|--|--|--|---|---|--|--|
| NDUFS3   | X | X | X | X |  |  |  |  |   |   |  |  |
| NNMT     |   |   |   |   |  |  |  |  |   |   |  |  |
| PAFAH1B3 |   |   |   |   |  |  |  |  |   |   |  |  |
| PDE6D    |   |   |   |   |  |  |  |  |   |   |  |  |
| PSENEN   |   |   |   | X |  |  |  |  | X |   |  |  |
| RABAC1   |   |   |   |   |  |  |  |  |   |   |  |  |
| RCN3     |   |   |   |   |  |  |  |  |   |   |  |  |
| RPL29    |   |   |   |   |  |  |  |  |   |   |  |  |
| RTN4IP1  | X | X |   |   |  |  |  |  |   |   |  |  |
| SH3BGRL3 |   | X | X |   |  |  |  |  |   |   |  |  |
| SLC25A1  | X |   |   |   |  |  |  |  |   |   |  |  |
| SMYD3    |   |   |   |   |  |  |  |  |   |   |  |  |
| SSU72    |   |   |   |   |  |  |  |  |   |   |  |  |
| STXBP6   |   |   |   |   |  |  |  |  |   | X |  |  |
| TFAP2B   |   |   |   | X |  |  |  |  |   |   |  |  |
| TMEM47   |   |   |   |   |  |  |  |  |   |   |  |  |
| TMSB10   |   |   |   |   |  |  |  |  |   |   |  |  |
| VAMP5    |   |   |   |   |  |  |  |  |   |   |  |  |
| VPS25    |   |   |   |   |  |  |  |  |   |   |  |  |
| ZDHHC4   |   |   |   |   |  |  |  |  |   |   |  |  |
| ZNF511   |   |   |   |   |  |  |  |  |   |   |  |  |
| ZNF706   |   |   |   |   |  |  |  |  |   |   |  |  |

**Table S6: Primers used for RT-qPCR (all indicated 5' to 3')**

| Transcript | Forward               | Reverse                 |
|------------|-----------------------|-------------------------|
| TMX1       | AGTCCTGGTGCTGTTGCTTT  | TTCTCCCCATTCAGCAAAC     |
| TMX3       | TTGCTATGGATGGCTTCCTC  | TGGGACTGTCAATTCATCCA    |
| NFAT1      | AAACTCGGCTCCAGAATCCA  | TGGACTCTGGGATGTGAACT    |
| NFAT2      | GCTATGCATCCTCCAACGTC  | AGTTGGACTCGTAGGAGGAG    |
| NFAT3      | ACACAGCCCTATCTTCAGGA  | ATCTTGCCTGTGATACGGTG    |
| NFAT4      | ACCCTTTACCTGGAGCAAAC  | CTTGCAGTAGCGACTGTCTT    |
| NFAT5      | CGTGTGTGTGGCTTCTATGT  | TGCCTCTCAATCAGAGAGAG    |
| XBPI       | CACCTGAGCCCCGAGGAG    | TTAGTTCATTAATGGCTTCCAGC |
| TBP        | CGGAGAGTTCTGGGATTGT   | GGTTCGTGGCTCTCTTATC     |
| MCUa       | CACACAGTTTGGCATTTTGG  | TGTCTGTCTCTGGCTTCTGG    |
| MCUb       | TTTTGCGTGTGAAGCTGTGT  | TACCAAGGGAAGGCCATGT     |
| NCLX       | ATGGTGGCTGTGTTCTGACCT | GGTGCAGAGAATCACAGTGACC  |

**Table S7: Primary antibodies used for immunoblotting and immunohistochemistry**

|                |                                                                                                           |                                                             |
|----------------|-----------------------------------------------------------------------------------------------------------|-------------------------------------------------------------|
| TMX1           | Goat pAb; TXNDC; Abcam #ab37876                                                                           | 1:1000 for immunoblotting<br>1:750 for immunohistochemistry |
| NFAT1          | Rabbit mAb; NFAT1 (D43B1) XP; Cell<br>Signal. Tech. #5861S                                                | 1:1000 for immunoblotting<br>1:750 for immunohistochemistry |
| HSP90          | Rabbit Ab; HSP90; Cell Signal. Tech.<br>#4874S                                                            | 1:1000 for immunoblotting                                   |
| Calnexin       | Rabbit pAb; Calnexin; ENZO#ADI-SPA-<br>860-F                                                              | 1:1000 for immunoblotting                                   |
| Actin          | Mouse Ab; beta-actin; Sigma #A5441                                                                        | 1:10 000 for immunoblotting                                 |
| AKT            | Rabbit Ab; AKT (D9E); Cell Signal. Tech.<br>#9272S                                                        | 1:1000 for immunoblotting                                   |
| p-AKT          | Rabbit mAb; pAKT S473 (D9E); Cell<br>Signal. Tech. #4060S                                                 | 1:1000 for immunoblotting                                   |
| GAPDH          | Rabbit mAb; GAPDH (14C10); Cell<br>Signal. Tech. #2118L                                                   | 1:1000 for immunoblotting                                   |
| BiP and<br>PDI | antibodies raised in rabbit were kindly<br>provided by Prof. Dr. Richard<br>Zimmermann (Homburg, Germany) | Both 1:1000 for immunoblotting                              |
| Melan-A        | Mouse mAb; Melan-A, Dako #7196                                                                            | 1:200 for immunohistochemistry                              |
| MCU            | Rabbit mAb; MCU (D2Z3B); Cell Signal.<br>Tech #14997                                                      | 1:500 for immunoblotting                                    |
| NCXL           | Rabbit pAb; Anti-SLC24A6 antibody;                                                                        | 1:500 for immunoblotting                                    |

|  |          |  |
|--|----------|--|
|  | #ab83551 |  |
|--|----------|--|
